1  
2  
3  
4  
5  
6  
7  
8  
9  
10  
11  
12  
13  
14  
15  
16  
17  
18  
19  
20  
21  
22  
23  
24  
25  
26

Barriers and facilitators to physical activity among Black women: a qualitative systematic review  
and thematic synthesis

Sherron L. Howard<sup>1</sup> and John B. Bartholomew<sup>1</sup>

<sup>1</sup>Department of Kinesiology and Health Education, The University of Texas at Austin, Austin,  
Texas, United States of America

\*Corresponding author:  
Email: [slhoward@utexas.edu](mailto:slhoward@utexas.edu)

27 **Abstract**

28 American Black women are less physically active than other American women. While several  
29 qualitative studies have investigated this issue, there has been no effort to synthesize this  
30 literature. *Purpose:* This study aimed to utilize qualitative thematic synthesis to employ an  
31 intersectionality framework in synthesizing existing published qualitative studies on barriers to  
32 and facilitators of physical activity for Black women and reflect constructs related to (a) all  
33 American women, (b) Black Americans, and (c) Black women. This qualitative thematic  
34 synthesis included 18 studies published from 2011 to the present. Studies were coded for  
35 quality and then reviewed with their themes identified and inductively integrated across the  
36 studies. The resulting themes were then deductively placed within a broader structure of an  
37 intersectionality framework. Reflecting this framework, three categories were identified: (1)  
38 general experience of physical activity for women, regardless of race, with themes of (a)  
39 motivation, (b) structured support, (c) overall health, (d) environment; (2) general experiences  
40 of physical activity for Black Americans, with a sub-theme of (a) low access; and (3) specific,  
41 intersectional experiences of physical activity for Black women, with sub-themes of (a) black  
42 hair, and (b) body ideal. Our synthesis of the existing qualitative research revealed that Black  
43 women experience PA related to being a woman, to being Black, and to the intersectional  
44 nature of being a Black woman. Interventions might target these intersectional themes to tailor  
45 interventions to support PA in Black women.

46

47 **Keywords:** race; exercise; gender; intersectionality; qualitative; systematic review

## 48 **Introduction**

49 Around 47 million people self-identify as Black, making up 14.2% of the United States'  
50 population with 51.8% being women.<sup>1</sup> Unfortunately, this population reports high levels of  
51 physical inactivity. As of 2020, non-Hispanic Black people have a 30% prevalence of inactivity  
52 outside of work.<sup>2</sup> Likewise, national surveillance data shows that only 27% to 52% of Black  
53 adults participate in regular physical activity, with Black women reporting lower levels of physical  
54 activity than Black men regardless of social determinants, e.g., socioeconomic status, and  
55 education.<sup>3</sup> Black women also have higher rates of cardiovascular disease, high blood  
56 pressure, and type 2 diabetes.<sup>4</sup> This is not surprising, as the links between physical activity and  
57 health share well-documented, biological mechanisms.<sup>5,6</sup> Despite a history of epidemiological  
58 research<sup>7</sup>, we do not have a firm grasp on why Black women report lower levels of physical  
59 activity.

60  
61 Potentially, contributors to behavioral choice derive in part from cultural factors<sup>8</sup> that might  
62 underlie differences between Black and other women. This has been most clearly studied for  
63 differences in body composition as White women are more likely to be motivated to engage in  
64 physical activity to achieve a thinner ideal than Black women.<sup>9</sup> It is also well-documented that  
65 Black communities view full-bodied women as attractive<sup>10</sup>, with Black women reporting greater  
66 body satisfaction than White women.<sup>11</sup> This has been attributed to traditional African societies  
67 viewing women with heavier shapes as healthy and wealthy, with these attributes setting the  
68 standard for beauty.<sup>12</sup> Black women tend to prefer the “coke bottle” shape or “thick” body that  
69 comes with profound breasts, a narrow waist, round hips, and a prominent buttock.<sup>13</sup> As a  
70 result, women of African descent are less likely to conform to the Western beauty standard of  
71 thinness.<sup>14-17</sup> Black women are less fearful of gaining weight and more likely to promote  
72 physically heavier models as the ideal body size than White women.<sup>18</sup> As a result, Black  
73 women, whose body mass index would rate them as obese, have higher self-esteem, body

74 satisfaction, and overall satisfaction with their appearance than similarly sized White women.<sup>19,20</sup>  
75 Moreover, Black women report less body satisfaction when underweight than when  
76 overweight.<sup>18,21</sup> While Black women who were socialized in a White social setting are more  
77 likely to prefer a thin ideal<sup>22</sup>, they still report that the Black community and Black men prefer a  
78 heavier, physical shape – promoting acceptance of a larger body size.<sup>20,22,23</sup> While differences in  
79 cultural ideals for body image serve to improve the mental health of Black women, it may  
80 remove a key motivational factor that contributes to the discrepancy in levels of physical activity  
81 between White and Black women. Thus, rather than superimposing a White ideal to the  
82 experience of Black women, it is important to consider their unique experience of their bodies.<sup>24</sup>  
83  
84 This perspective emphasizes the need to apply an intersectionality framework to understand the  
85 experience of Black women regarding physical activity. Black women’s experience includes two  
86 minorities, being Black and being a woman, and Black women broadly experience three  
87 categories of barriers related to physical activity. Those that are common to American women,  
88 those that are common to American Black people, and those unique barriers experienced by  
89 American Black women.<sup>25,26</sup> This, in turn, creates unique impacts on physical activity for Black  
90 women that are distinct from the other groups.<sup>9</sup> Thus, the experience of Black women is not  
91 merely the additive effects of being Black and a woman, with Black women having to combat  
92 different forms of marginalization arising from more than one status.<sup>27</sup> Instead, the  
93 intersectionality of being Black and a woman raises unique experiences beyond the common  
94 challenges that they face with other women and other Black people. For example, self-  
95 conciseness surrounding hair is uniquely experienced by Black women, whose time and  
96 financial investment is significantly greater than other groups of women.<sup>22</sup> It is, therefore,  
97 surprising that the existing literature has failed to apply an intersectionality framework to  
98 understanding the physical activity behavior of Black women. This likely undermines efforts to

99 understand barriers and facilitators to physical activity and to develop interventions to target  
100 Black women.

101  
102 A recent narrative review by Obi et al. (2023) tried to understand physical activity and African  
103 women. Their findings identified significant barriers to physical activity such as body image  
104 perception, hair care concerns, gender norms, fear of sexual stereotypes, and family  
105 responsibilities that limit their involvement in physical activity. There were, however, several  
106 limitations to this paper. It drew studies from multiple countries. While this is a strength as it  
107 reflects broad differences across countries and barriers common to Black women of African  
108 descent, it does not reflect the specific cultural factors that might influence physical activity in  
109 Black women in America. Given the unique experience of Black people in America, it is not clear  
110 that the experience of Black women in other countries would generalize to the United States. In  
111 addition, they completed a narrative review that included a small set of qualitative studies along  
112 with mostly quantitative research. This excluded the majority of the existing qualitative research.

113  
114 Barnett & Praetorius (2015) conducted a qualitative-interpretive meta-synthesis on African  
115 American women and their nutrition and physical activity. They found themes of family,  
116 structured support, translating knowledge into behavior modifications, barriers, and God is my  
117 healer. Their themes were intertwined one with another and only one theme could clearly be  
118 labeled physical activity related (barriers). This is a limitation of their study. An additional  
119 limitation that can also be considered a positive of their study is they focused on cultural  
120 influences on nutrition but not on physical activity. A broader thematic synthesis of the available  
121 qualitative research on American Black women is required to better understand the cultural  
122 experience of this population with regard to physical activity. Moreover, both studies lacked a  
123 theoretical framework to guide the interpretation of their data. This present review will address  
124 this through an application of the intersectionality framework.

125  
126 A qualitative synthesis allows for a critical review of the existing, qualitative literature on a  
127 topic.<sup>29</sup> It applies a rigorous assessment of study quality while synthesizing the responses of  
128 participants across the existing research. In addition, core themes are re-assessed and  
129 interpreted across studies to provide a broader understanding of the data. In this case, our  
130 review includes responses from a large group of Black women, drawn from multiple qualitative  
131 studies. Their range of responses might reveal different categories of barriers and facilitators  
132 than is possible in a single study and small group of participants. Thus, the purpose of this study  
133 was to use qualitative thematic synthesis to apply an intersectionality framework to synthesize  
134 available published qualitative studies on physical activity barriers and facilitators for Black  
135 women. By synthesizing existing qualitative literature, within an intersectionality framework, we  
136 hope to better understand the different forms of barriers and facilitators for physical activity as  
137 reported by American Black women. This, in turn, should help guide interventions that target  
138 Black women for increased physical activity.

139

## 140 **Methods**

141 Approach. Following the identification of studies that fit the inclusion criteria, we assessed the  
142 quality of each study utilizing the Critical Appraisal Skills Programme (CASP).<sup>31</sup> We then used  
143 an analytic approach that blended both inductive and deductive methods. Thematic analysis  
144 was employed inductively to classify these data and formulate novel themes that extend beyond  
145 the content of the initial study findings. Themes were then deductively grouped into components  
146 of the intersectionality framework.

147

148 Sample of Literature. The search terms were: Black women, African American women, physical  
149 activity, exercise, qualitative, interview, and focus group, with the search from 2011-2023.

150 Barnett & Praetorius (2015) completed a qualitative interpretative meta-synthesis on articles

151 published before the year 2011, therefore we focused on articles that were published from the  
152 year 2011. These words and years were used in the following databases: PubMed, Ovid  
153 Medline, PsychInfo, CINAL, and Web of Science. The inclusion criteria were: 1) published in  
154 peer-reviewed journals, 2) published in English, 3) included a sample of American Black  
155 women, 4) used qualitative or mixed methods design (e.g., interview, focus group), 5) explored  
156 physical activity barriers and/or facilitators for Black women, and 6) direct quotes about physical  
157 activity barriers and/or facilitators. Our search was limited to research conducted in the United  
158 States as we hypothesize cultural influences as well as Black Americans' experiences are  
159 different from Black people in other countries. The search yielded 6,783 articles. After a title  
160 review, 6,611 articles were excluded leaving a total of 172 articles. After reviewing abstracts, we  
161 removed 147 articles for not having Black focus groups, duplicates, no physical activity themes,  
162 and not being a qualitative method. This left 26 articles. Seven of these were removed for not  
163 having quotes about physical activity. One was eliminated for including both physical activity  
164 and nutrition without physical activity quotes. Figure 1 shows a graphical representation of the  
165 sample of literature steps. Table 1 provides the detailed demographics of the final 18 studies.

166  
167 Quality Check. The Critical Appraisal Skills Programme is used to assess the validity, relevance,  
168 and applicability of qualitative research studies.<sup>31</sup> Table 1 shows the total score given for each  
169 study. Studies received a score of 0 (no), 0.5 (can't tell), or 1 (yes) in ten categories: (1) clear  
170 study aim, (2) methodology, (3) appropriate design, (4) recruitment strategy, (5) data collection,  
171 (6) bias, (7) ethical considerations, (8) data analysis, (9) clear findings, and (10) value of  
172 research.<sup>31</sup> Out of a possible high score of 10, 14 of the 18 studies received a score of 8 or  
173 above with one study receiving 7 and three studies receiving a 7.5. The common limitation  
174 centered on bias in recruitment. Thirteen of the 18 studies received a low score of 0 for bias and  
175 the remaining five received a score of 0.5. This reflected our interpretation that bias was not  
176 considered when creating interview questions and during analyses. The other aspects of the

177 quality review were more consistently strong across studies. As a result, no studies were  
178 eliminated due to low quality.

179

180 Data Extraction. This step was to extract the themes from the original studies, which would  
181 serve as the data for analysis. The themes from all 18 studies were extracted, as written,  
182 verbatim by the author to maintain the integrity of each study. These are shared in Table 2.

183

184 Data Analysis. The analysis was designed to synthesize and translate the themes to reflect the  
185 shared understanding of Black women and their intersectional barriers to physical activity  
186 across the studies. First, both authors synthesized and translated the original, source themes  
187 into new overarching themes that cross studies. The process of synthesis entailed evaluating  
188 the similarity between the extracted themes and consolidating them into initial categories for  
189 translation. After synthesizing the themes, we proceeded with the translation, which resulted in  
190 a fresh set of themes and a more cohesive comprehension of the data. To achieve the  
191 appropriate translation of sources, a total of 18 separate studies that shared the experiences of  
192 413 Black women whose ages ranged from 18 to 80 were incorporated (refer to Table 1 for  
193 demographic details). Translation was accomplished through collaborative efforts among the  
194 authors, involving theme development and result formulation. This involved a review of original  
195 quotes when available and, in some cases, movement of source themes to other categories of  
196 broad themes.

197

## 198 **Results**

199 The purpose of our analysis was to review and synthesize available qualitative studies on  
200 physical activity in Black women to determine if there are intersectional themes that reveal  
201 barriers or facilitators specific to Black women for physical activity. Our deductive, intersectional  
202 categories included: general experiences for all people, race-related experiences of Black



203 people, and intersectional experiences of Black women. Five themes emerged from our  
204 inductive analysis: (1) motivation, (2) structured support, (3) overall health, (4) environmental  
205 factors, and (5) intersectional experiences with ten sub-themes: (a) habit, (b) intent to engage,  
206 (c) social norms, (d) social support, (e) health outcomes, (f) health literacy, (g) environment, (h)  
207 low access, (i) black hair, and (j) body ideal. The sub-themes serve as either facilitating factors  
208 to increase physical activity or barriers to reduce physical activity. We present these facilitators  
209 and barriers together to illustrate the variability amongst Black women in their experience of  
210 each theme. Table 3 shows how the original themes were recategorized into new categories,  
211 overarching themes, and sub-themes. The interpretive discussion of the disentanglement of  
212 these themes follows with quotes provided when available from the original manuscripts to  
213 illustrate the analysis.

214

215 General Physical Activity Experiences of All People. These themes reflected a mix of barriers  
216 and facilitators that are common experiences of many people.

217 Motivation was viewed as a broad driver of physical activity that could serve as both a facilitator  
218 and a barrier – depending on where they sat on the continuum. Sub-themes included habit and  
219 intent to engage.

220 Habit. Participants discussed how getting into a routine motivated them to engage in physical  
221 activity daily. A participant stated, *“The more I went to the activities the more I started to get up  
222 and pop up out of the bed in the morning, and I thought I, you know, just kind of hit me why. I  
223 wake up in the morning and I’m not, you know, stiff or I’m not—I don’t know how you could  
224 describe that. It just all of a sudden, I realized, wow, I’m not stiff anymore.”*<sup>32</sup> An additional  
225 participant discussed the importance of planning in advance to create the habit of being  
226 physically active. *“It’s not something I do now, but in the past, one of the biggest things was just  
227 planning and preparation... if I had a plan in advance, it’s a lot easier to follow through and to  
228 stay on top of it.”*<sup>33</sup>

229  
230 Intent to Engage. However, most participants expressed a general lack of motivation to perform  
231 physical activity.<sup>34</sup> For example, one participant compared their lack of motivation to smoking, “I  
232 really, really, really do want to be. I just lack motivation, so when I think about sometimes you  
233 meet someone and they say, “Well, I know I need to stop smoking, I got cancer, but I need to  
234 stop smoking”—I understand now, so I empathize with them because it’s not that you don’t  
235 care—it’s just something that you’re not changing.”<sup>35</sup> In contrast, other participants emphasized  
236 a negative motivation for PA, “. . . There is some type of apprehension in the back of my mind,  
237 and I’m trying to figure out why, but I really need to say, “Go ahead, start doing it.” I guess I feel  
238 that if I start, I’m going to have to continue. It’s going to change my routine. [And that] Moves me  
239 out of my comfort zone.”<sup>35</sup> Many participants expressed a lack of motivation and/or confidence  
240 to do physical activity<sup>35</sup> despite a general desire to perform physical activity, but the motivation  
241 was lacking to carry that desire to action.<sup>36</sup>

242  
243 Structured Support refers to the different areas of support needed to engage, maintain, or  
244 disengage from physical activity with two sub-themes of social norms and social support.  
245 Social Norms. Some women discussed including their family in their physical activity to help with  
246 accountability. “It, it helps me because, like I said, a lot of times when I get off work... I don’t feel  
247 like doing anything... so what they [family] have done for me recently is ... [they] still hold me  
248 accountable; ‘let’s go walk outside’ or... if we’re going to the mall, ‘let’s just take two laps,’ even  
249 though we’re going to the mall for something else.”<sup>37</sup> Others utilize their family and want to  
250 remain involved as a motivator for physical activity. “For me, I think it comes to normalcy, I  
251 guess. So, normalcy [referring to the benefits of being active] to be in a category with the rest of  
252 my peers, my family, and being able to maybe keep up with family – with my son and my  
253 husband – and being able to do those things and not be exhausted or not sit out the ride or sit  
254 out the trip for whatever reason.”<sup>37</sup> Another expressed how physical activity allowed her to

255 socialize with her friends and adapt to different kinds of physical activity. “[Be]cause we all do  
256 very different kinds of physical activities... it made me... adapt in what I felt like I was willing  
257 to... to try to be able to do. And now I’ve found some new things that I really enjoy.”<sup>37</sup> An  
258 additional participant agrees that having active friends motivates them to continue and allows  
259 them to be held accountable. “I think having a friend who is at your level or maybe somewhere  
260 around your level as far as physical activity, that’s definitely an encouragement and you can  
261 both hold each other accountable and things like that.”<sup>33</sup>

262  
263 Social Support. Many participants discussed the importance of social support when it comes to  
264 physical activity. “I think I’m a good influence . . . I’m kind of a self-motivated person, but a lot of  
265 people want me to motivate them, so I have to call them. “Let’s go out and walk.” Nobody calls  
266 me. I’m the one. So maybe if I get somebody to tell me that also I’d go out more often.”<sup>35</sup>

267 Similarly, participants agreed that they prioritize other’s health over their own and would do so  
268 when it comes to increasing their physical activity.<sup>34</sup> “If a family member or friend came up to me  
269 and they were sick and said, ‘Honey, if I don’t exercise, then I’m going to die. I would exercise  
270 with that person if it kills me. I’ll do it for somebody else quicker than I’ll do it for me.’”<sup>34</sup>

271  
272 Participants also discussed the importance of their social environment and the potential  
273 motivating force of seeing their neighbors being active.<sup>35</sup> In addition, some quotes were  
274 interpreted in the original paper as particular to the Black experience, but our analysis indicated  
275 broader, issues with social support. For example, “It’s not promoted enough in... African  
276 Americans. And I think it’s from your family. If you didn’t come from a family that exercised and  
277 I’m going to tell the truth, shame the devil, my parents didn’t exercise. My grandparents didn’t  
278 exercise.”<sup>38</sup> Many participants mentioned that their family members did not exercise regularly  
279 nor talked about the importance of exercise.<sup>38</sup> While the participants are speaking from their  
280 experience as Black Americans, and the original manuscript placed this in a racial framework,

281 our view is that multi-generational modeling is a form of social support for people of all races  
282 and ethnicities and should be included in the general experiences of all people.

283

284 Overall Health refers to the physical, mental, and educational health of all people with two sub-  
285 themes of health outcomes and health literacy.

286 (e) Health Outcomes. Participants note how important physical activity is for aging, energy  
287 levels, and mental health. *"I started getting the results I wanted, [and] it became less about that*  
288 *and more about feeling good. Being able to do a workout provides me with... a mental and*  
289 *physical stress release."*<sup>35</sup> Another participant added, *"I just want to keep this up, and I just feel*  
290 *like it's necessary as I continue to age, and I'm a single woman.... I want to be able to take care*  
291 *of myself for a long time (laughs)."*<sup>37</sup> Other participants emphasize the importance of physical  
292 activity to live a long healthy life. *"For me, the motivating factor is I want to live. You know.*  
293 *Straight up, I want to live...you see people who are passing away at your age, I guess. And, you*  
294 *know, because of heart attacks or, you know, things, diabetes or whatever these things, all*  
295 *these health obstacles and just different challenges because of, I'll say laziness, just being real*  
296 *about it, you know."*<sup>33</sup> The desire to live a long healthy life with the added benefit of stress relief  
297 helps them to engage in physical activity.

298

299 (f) Health Literacy. Participants described confusion with the recommendations for daily physical  
300 activity. *"... Not thought-out, but some people might not know what moderate is, you know, to*  
301 *intensity... because you do have a lot of what you call the average Joe, they're not middle class,*  
302 *they're not gone to college, half of them really basically have not even finished high school...*  
303 *people like that, which is call the average Joe, you are going to have to do – break it down in*  
304 *just a little bit more, what they said, layman's terms..."*<sup>39</sup> This participant is emphasizing the  
305 importance of presenting information at a level that is more accessible.

306

307 Environmental Factors. This theme housed a sub-theme that was related to all people  
308 (environment) and one that was specific to Black people (low access).

309 Environment. Participants discuss the importance of green spaces and how that is a facilitator to  
310 be physically active. “. . .and this is like in the back of my house. . . you know there is a big field  
311 and there is like a walkway through the park district. . . they put walkways and bikeways. I just  
312 like the nature, it just lifts you up, it is just beauty. It is a beauty of nature and it makes you. .

313 .eyes get in tune with nature. I love to hear the birds, I love to hear the crickets, I love all of that;  
314 the creatures that are on the earth, now does that make sense?”<sup>40</sup> Participants also discussed

315 the importance of neighborhoods and workplaces and how these places influence their physical  
316 activity. “. . . I took on a . . . position at an insurance company . . . that job required me . . . [to] read  
317 death certificates all day, as well as medical records. So, I was spending a lot of time . . . reading  
318 about the things that are killing us [African Americans] off . . . that was really a catalyst . . .”<sup>37</sup>

319 Another participant mentions, “I get an opportunity to educate patients a lot . . . so even if they're  
320 not diabetic, or even if they do not have high blood pressure . . . you can educate [about  
321 exercising].”<sup>37</sup> This participant utilizes their environment to promote the importance of physical  
322 activity.

323

324 Race-Related Experiences of Black People. There was one sub-theme that reflected the  
325 experience common to Black men and women as they relate to the historic marginalization of  
326 this population.

327 Low Access. Numerous studies described themes related to being Black and living in a  
328 historically marginalized neighborhood. Participants felt there were not enough recreational  
329 spaces – specifically in Black neighborhoods.<sup>38</sup> “I think that the division between somebody  
330 being African American and Caucasian is like in a predominantly black neighborhood, there  
331 aren't facilities . . . but where a Caucasian person might live . . . they probably have more, you know,  
332 facilities where they can go to exercise.”<sup>38</sup> Likewise, accessibility and safety were a common

333 concern among participants in a second study<sup>35</sup> with these factors undermining their confidence  
334 that they could safely walk outside of the home. Finally, participants in a third study felt they had  
335 limited financial resources to pursue exercise.<sup>41</sup> *"I got so much other stresses on my mind.  
336 You're not worried about walking down to begin a physical activity program if you worried about  
337 paying your rent. I worry about using my money to pay my bills. I'm not worried about nothing  
338 else."*<sup>41</sup>

339  
340 Intersectional Experiences of Black Women. Finally, two primary sub-themes specifically  
341 reflected the experience of being a Black woman.

342 Black Hair. Two articles had a particularly strong response to the issues of styling and  
343 maintaining Black hair following PA as restyling hair was more time-consuming and expensive  
344 than for women of other races.<sup>42,43</sup> *"I am going to a luncheon, I probably am not going to  
345 exercise that morning."*<sup>42</sup> In comparison, *"For a corporate person, Black woman, it's like a daily  
346 issue [referring to 'sweating out' her hairstyle]...it's the whole image thing."*<sup>42</sup> Interestingly, this  
347 applied to Black women of all ages, *"As a teacher during recess time, I noticed that the little  
348 black girls were not out on the playground playing, and they did not want to go in the gym, you  
349 know bounce the ball and do all of that because they were wearing braids and they had long  
350 hair and they said 'no mama said don't go out there and play because I will mess up my hair.'" <sup>42</sup>*

351 In addition to the barrier of time to style hair, they reported an added financial burden due to the  
352 increase in hair salon visits and purchases of more hair products as regular exercise increased  
353 the frequency of hair maintenance.<sup>42</sup> *"I've had friends that would stop workout programs if it  
354 meant that they were about to have a hair appointment...or wait until they [have] micro braids or  
355 in curls or whatever."*<sup>43</sup> Additionally, participants noted the rules of some facilities did not allow  
356 the use of headscarves as a way to maintain their hairstyles. *"Some gyms won't allow you to  
357 wear hair scarves ..., if you ever read their rules, they won't let people wear scarves on their  
358 heads."*<sup>43</sup>

359  
360 Participants also highlighted the differences between themselves and their counterparts when it  
361 came to lunch break physical activity and their hairstyles. *"I see my Hispanic and White*  
362 *counterparts; they're going on lunch break to exercise. I'm not doing that because I'm not going*  
363 *to look the same when I get back."*<sup>43</sup> Participants felt their counterparts have different  
364 experiences when it comes to their hair and wished they would be respected based on their  
365 experiences. *"I feel like if White people really understood how our hair works and the things we*  
366 *have to go through, then they would just let it go. Because I don't 'necessarily have to wash my*  
367 *hair when I come home from the gym, but they'll be like 'Eww, you didn't wash your hair.'"*<sup>43</sup>  
368 Additionally, *"They're [referring to her coworkers] like, 'Oh, what did you do different?' 'Nothing.*  
369 *It's the same thing.' ... But it's extra for us. We have to justify every hairstyle we have."*<sup>43</sup> This  
370 lived experience can have effects on physical activity.

371  
372 Body Ideal. Women discussed the cultural ideal of a Black woman's body, and that physical  
373 activity would undermine their efforts to be sexually attractive. For example, women expressed  
374 how exercising could cause them to reduce the size of their chest or hips and they did not want  
375 to be "stick thin". *"As a black woman you don't want to be seen without curves. You want to*  
376 *keep your curves."*<sup>44</sup> Another participant explained a conversation with her doctor who did not  
377 share her view of the ideal body, *"Like she thinks I need to lose weight. And I keep explaining to*  
378 *her that a lot of my weight is in my hips and thighs and butt. Like what am I supposed to do*  
379 *about that? I can't be that way. I have muscle."*<sup>45</sup> Other participants also equated "thickness"  
380 with attractiveness and muscularity and did not feel they were obese. *"Thick is like ok \*laughs\*.*  
381 *Fat is like there's some rolls. Thick is like they got some muscles they got a little booty. Hips but*  
382 *it's kind of toned in a way. That's thick."*<sup>45</sup>

383

384 The interpretation of the themes related to the intersectional framework suggests that there is a  
385 clear message that physical activity is focused on the experience of White women. While much  
386 of the existing qualitative literature on Black women seems to be oriented to reflect this focus, a  
387 distinct message is likely required to build on the strengths of Black women to promote physical  
388 activity. This interpretation is supported by a series of focus groups with active and inactive  
389 Black women.<sup>46</sup> Sebastião et al. (2015) showed that Black women have trouble understanding  
390 the Center for Disease Control guidelines and when presented with a revised document they  
391 still felt the requirements and suggestions were not representative of them. One active woman  
392 felt, “...for black women... there were restrictions on the physical activity for Black Americans...  
393 *You couldn't even go swimming in the pool. You were restricted. You certainly couldn't hang out*  
394 *at the track in the high school and walk around the track at a high school and be suspect. You*  
395 *couldn't go to a public beach and swim...*”<sup>46</sup> An inactive woman had similar sentiments, “... it  
396 *has a lot to do with economics... looking at these lists [examples of activities provided in the*  
397 *materials for moderate and vigorous intensity] to me I still keep going back to the black versus*  
398 *white, whereas these are not the things we have thought of all of our entire lives.*”<sup>46</sup> This  
399 highlights the importance of representative information when promoting physical activity, as well  
400 as, considering the lived experiences of Black women when creating interventions.

401

## 402 **Discussion**

403 This paper was designed to apply an intersectional framework to reflect the experiences of  
404 Black women when incorporating physical activity into their lives. This was accomplished by  
405 synthesizing the findings of 18 qualitative studies. Three categories were deductively used to  
406 reflect the intersectionality framework: general experiences of all people, race-related  
407 experiences of Black people, and intersectional experiences that are unique to Black women.  
408 The inductive analysis of the 18 articles revealed five themes that reflected both barriers and  
409 facilitators: motivation, structured support, overall health, environmental factors, black hair, and



410 body ideal. Motivation, knowledge, and confidence were expressed across the majority of the  
411 studies.<sup>32-36,39,46-50</sup> This is not surprising as these represent some of the most studied constructs  
412 in the history of physical activity research. They are common contributing factors and should be  
413 addressed when developing interventions for physical activity regardless of the gender, race, or  
414 ethnicity of the population. That is, Black women experience the same barriers and facilitators  
415 as most people who seek to adopt an active lifestyle. Additionally, we found themes that  
416 centered on Blackness and the impact of historical poverty on knowledge and access to  
417 physical activity.<sup>44</sup> We felt these themes were race-related rather than intersectional barriers as  
418 they apply to both Black men and women and would be important to consider when designing  
419 interventions for Black people and other populations that have historically experienced  
420 marginalization.

421  
422 In contrast, only 4 of the 18 studies identified barriers that were unique to Black women. Two of  
423 these were specifically focused on the challenges of Black hair and the cost and time required  
424 to style hair following exercise.<sup>42,43</sup> This was found to be passed along through generations, with  
425 one comment discussing the lack of activity for Black girls at recess due to concerns that it  
426 would impact their hair.<sup>42</sup> The other two studies focused on the perceived incompatibility of  
427 physical activity with the preferred body image for Black women.<sup>44,45</sup> For many, physical activity  
428 is motivated by the thin ideal dominant in White culture.<sup>24</sup> In contrast, Black women seek a  
429 curvy, “thick” body type and express concern that too much physical activity will reduce these  
430 curves and make them less attractive. Body image has been consistently cited as a motivator  
431 for physical activity<sup>44</sup>, but this has largely followed the White ideal of thinness<sup>9</sup> rather than reflect  
432 the ideal body image of Black women. For example, only one study mentions weight loss or  
433 body size as a motivator for physical activity<sup>33</sup> which is in direct opposition to the majority of  
434 work on White women. Previous reviews have also shown body image perception, hair care  
435 concerns, and family responsibilities<sup>28</sup> as a benefit and barrier to physical activity. Additionally,

436 Barnett & Praetorius (2015) applied a cultural lens and identified race-related barriers. In  
437 contrast, the present review applied the intersectionality framework to disentangle motivators  
438 and barriers specific to Black women. This review also provides a better understanding of  
439 facilitators and barriers to Black women specifically. Therefore, it is critical to consider physical  
440 activity from the perspective of Black women and their unique considerations of physical  
441 attractiveness. Core issues with body image in Black women center on skin tone, hair, and body  
442 shape.<sup>22</sup> Given the importance of these factors, it is surprising that none of the papers  
443 mentioned skin tone and only two mentioned hair. Clearly, there is a need for further research to  
444 test the association between body image and physical activity for Black women, along with how  
445 to incorporate this information into interventions to promote physical activity in Black women.  
446

447 It was interesting that participants in one paper discussed the potential to be motivated to be  
448 physically active if it benefited someone else's health.<sup>34</sup> This comment may reflect the  
449 Superwoman Schema framework. The Superwoman Schema refers to a set of beliefs and  
450 behaviors characterized by an excessive need to be successful, competent, and to excel in  
451 multiple roles, often at the expense of one's well-being.<sup>51</sup> This framework reflects a role  
452 orientation that was adopted to confront and transcend the challenging historical and  
453 sociopolitical context of gendered racism.<sup>51</sup> Of note, Black women often feel the need to help  
454 others before helping themselves, which may provide an avenue to intervene to build  
455 motivation. Behaving for the benefit of others also reflects more general theories of health  
456 behavior. For example, the Transtheoretical Model hypothesizes Environmental Re-evaluation  
457 as a key process of change where the individual considers the impact of their behavior on  
458 others.<sup>52</sup> Thus, it is not clear if this desire to be physically active to support others is common  
459 across people or if it is experienced to a greater extent by Black women. This is likely a useful  
460 area for future research.

461

462 Five of the included studies acknowledge race-related barriers, and only 4 of the 18 articles  
463 include any themes that were specific to the experience of the intersectional nature of being a  
464 Black woman. This was a surprising pattern since the articles were specifically designed for  
465 Black women. This may be due to differences in the underlying theories that drove the structure  
466 and framing of their qualitative design. Two articles were specifically focused on the challenges  
467 of Black hair<sup>42,43</sup> and were the only studies to report on these themes – despite these themes  
468 being supported in other reviews.<sup>28,29</sup> Another<sup>45</sup> began with questions informed by Black  
469 Feminist Theory, which offers a critical lens to analyze and challenge the interconnected  
470 systems of racism, sexism, and other forms of oppression.<sup>53</sup> This resulted in a unique set of  
471 themes centered on body ideals. Of the remaining studies, only four reported themes specific to  
472 the intersectionality of Black women. Whereas the others took a more open and general line of  
473 questioning without a specific consideration or inclusion of an overarching theory or framework  
474 of race. It may be that more specific questions are required to create trust and gain insight into  
475 the experience of minoritized people, particularly when the area under study reflects the  
476 dominant White culture.

477  
478 Qualitative research provides space for people to share their experiences unencumbered by the  
479 limits of a narrow set of items on a questionnaire.<sup>54</sup> Of course, people can only respond to the  
480 questions they are asked. Therefore, it is important to (1) acknowledge the researcher's  
481 positionality and (2) utilize critical theories tied to the positionality of the participants. That is, if  
482 we want to understand participation in physical activity for Black women, we might approach this  
483 research informed by the existing research on the unique experiences of Black women. One  
484 way to achieve this goal would be to utilize sociological perspectives when developing and  
485 implementing physical activity interventions for Black women. As is the case with every  
486 intersectional group of individuals, Black women are multifaceted, and their experience is  
487 unique. The use of critical race theories (Black Feminist Theory, Superwoman Schema,

488 Intersectionality Framework, etc.) helps to gain a deeper understanding of their perspectives of  
489 the world that are likely to inform their experience with physical activity.

490

#### 491 *Limitations*

492 A primary limitation is that we could only include 18 studies that fit the inclusion criteria. While  
493 this included 413 women across at least 12 states in the USA, it falls short of reflecting the  
494 population of Black American women, which should be taken into consideration before  
495 generalizing these results. Since only 12 states were included in the 18 studies, location could  
496 play a role in our findings since intersectional experiences can happen differently by region of  
497 the United States.<sup>55</sup> Finally, we focused only on Black American women to the exclusion of  
498 other cultures. This not only excludes women from other countries, but it also likely fails to  
499 represent the range of cultures within the American Black community.<sup>56</sup> As the intersectionality  
500 framework will be experienced differently across cultures this, again, requires additional study.

501

#### 502 **Conclusion**

503 Despite these limitations, there are clear strengths. This is the first study to synthesize the  
504 existing qualitative research on physical activity for Black American women and to do so within  
505 an intersectionality framework. As a result, it provided several novel findings and highlighted the  
506 benefit of a sociological approach to the study of disparities in physical activity. As such, these  
507 results not only inform future research on health disparities but can be used to guide  
508 interventions that are specifically tailored to Black American women.

509

#### 510 **Declarations**

511 *Ethics Approval and Consent to Participate*

512 Not applicable

513

514 *Consent for Publication*

515 Not applicable

516

517 *Availability of Data and Materials*

518 Data sharing does not apply to this article as no datasets were generated or analyzed during the  
519 current study.

520

521 *Competing Interests*

522 The authors declare that they have no competing interests.

523

524 *Funding*

525 This manuscript is a systematic review and does not require funding.

526

527 *Acknowledgments*

528 The authors thank Christy L. Erving, Ph.D., Earl W. Huff, Jr., Ph.D., Taylor Payne, Ph.D., and  
529 Jaylen I. Wright, Ph.D. for their comments on early drafts of this manuscript.

530

531

532

533

534

535

536

537

538

539

540 **References**

- 541 1. Moslimani M, Tamir C, Budiman A, Noe-Bustamante, Mora L. Facts about the U.S.  
542 Black population. [Internet]. 2023 Mar 2 [cited 2023 Sep 14]. Available from:  
543 [https://www.pewresearch.org/social-trends/fact-sheet/facts-about-the-us-black-](https://www.pewresearch.org/social-trends/fact-sheet/facts-about-the-us-black-population/)  
544 [population/](https://www.pewresearch.org/social-trends/fact-sheet/facts-about-the-us-black-population/).
- 545 2. Centers for Disease Control and Prevention. Adult Physical Inactivity Prevalence Maps  
546 by Race/Ethnicity. [Internet]. 2022 Nov 13 [cited 2023 Sep 14]. Available from:  
547 <https://www.cdc.gov/physicalactivity/data/inactivity-prevalence-maps/index.html>.
- 548 3. Williams WM, Yore MM, Whitt-Glover MC. Estimating physical activity trends among  
549 blacks in the United States through examination of four national surveys. *AIMS Public*  
550 *Health*. 2018;5(2):144-157.
- 551 4. Benjamin EJ, Muntner P, Alonso A, Bittencourt MS, Callaway CW, et al. Heart Disease  
552 and Stroke Statistics—2019 Update: A Report from the American Heart Association.  
553 *Circulation*. 2019;139(10).
- 554 5. Eckel RH, Jakicic JM, Ard JD, de Jesus JM, Miller NH, et al. 2013 AHA/ACC guideline  
555 on lifestyle management to reduce cardiovascular risk: a report of the American College  
556 of Cardiology/American Heart Association Task Force on Practice Guidelines.  
557 *Circulation*. 2014;129(25\_suppl\_2):S76-S99.
- 558 6. Malina RM, Bouchard C, Bar-Or O. Growth, maturation, and physical activity. *Human*  
559 *Kinetics*. 2004.
- 560 7. Zhang J, Jemmott III JB. Mobile app-based small-group physical activity intervention for  
561 young African American women: a pilot randomized controlled trial. *Prevention Science*.  
562 2019;20:863-872.
- 563 8. Barnett TM, Praetorius RT. Knowledge is (Not) Power: Healthy Eating and Physical  
564 Activity for African-American Women. *Social Work in Health Care*. 2015;54(4):365–382.  
565 <https://doi.org/10.1080/00981389.2015.1005272>.
- 566 9. Ray R. An Intersectional Analysis to Explaining a Lack of Physical Activity Among Middle  
567 Class Black Women: Intersectionality, Physical Activity, and Middle Class Black Women.  
568 *Sociology Compass*. 2014 Jun;8(6):780–91.
- 569 10. Webb TT, Looby EJ, Fults-McMurtery R. African American men’s perceptions of body  
570 figure attractiveness: An acculturation study. *Journal of Black Studies*. 2004;34:370-385.  
571 Crossref.
- 572 11. Frederick DA, Crerand CE, Brown TA, Perez M, Best CR, Cook-Cottone CP, et al.  
573 Demographic predictors of body image satisfaction: The US Body Project I. *Body Image*.  
574 2022;41:17-31.
- 575 12. Shuttlesworth ME, Zotter D. Disordered eating in African American and Caucasian  
576 women: The role of ethnic identity. *Journal of Black Studies*. 2011;42:906-922. Crossref.  
577 PubMed.
- 578 13. Gentles-Peart K. *Romance With Voluptuousness: Caribbean Women and Thick Bodies*  
579 *in the United States*. Lincoln: University of Nebraska Press; 2016.
- 580 14. D’Alonzo KT, Fischetti N. Cultural beliefs and attitudes of Black and Hispanic college-  
581 age women toward exercise. *Journal of Transcultural Nursing*. 2008;19(2):175–183.
- 582 15. DeBragas N, Hausenblas HA. Media Exposure of the Ideal Physique on Women’s Body  
583 Dissatisfaction and Mood: The Moderating Effects of Ethnicity. *Journal of Black Studies*.  
584 2010;40:700–716.
- 585 16. Grabe S, Hyde JS. Ethnicity and body dissatisfaction among women in the United  
586 States: A meta-analysis. *Psychological Bulletin*. 2006;132:622-640. Crossref. PubMed.
- 587 17. Kashubeck-West S, Coker AD, Awad GH, Stinson RD, Bledman R, Mintz L. Do  
588 measures commonly used in body image research perform adequately with African

- 589 American college women? *Cultural Diversity and Ethnic Minority Psychology*.  
590 2013;19(3):357. <https://doi.org/10.1037/a0031905>.
- 591 18. Perez M, Joiner T. Body image dissatisfaction and disordered eating among Black and  
592 White women. *International Journal of Eating Disorders*. 2002;31:442-454. Crossref.
- 593 19. Kumanyika S, Wilson JF, Guilford-Davenport M. Weight-related attitudes and behaviors  
594 of Black women. *Journal of the American Dietetic Association*. 1993;93:416-422.  
595 Crossref. PubMed.
- 596 20. Choate LH. Toward a theoretical model of women's body image resilience. *Journal of*  
597 *Counseling & Development*. 2005;83:320-330. Crossref.
- 598 21. Mama SK, Quill BE, Fernandez-Esquer ME, Reese-Smith JY, Banda JA, Lee RE. Body  
599 Image and Physical Activity among Latina and African American Women. *Ethnicity and*  
600 *Disease*. 2011;21:281-287.
- 601 22. Awad GH, Norwood C, Taylor DS, Martinez M, McClain S, Jones B, et al. Beauty and  
602 body image concerns among African American college women. *Journal of Black*  
603 *Psychology*. 2015;41(6):540-564.
- 604 23. Jackson LA, McGill OD. Body Type Preferences and Body Characteristics Associated  
605 with Attractive and Unattractive Bodies by African Americans and Anglo Americans. *Sex*  
606 *Roles*. 1996;35:295-307.
- 607 24. Watson LB, Lewis JA, Moody AT. A sociocultural examination of body image among  
608 Black women. *Body Image*. 2019;31:280-287.  
609 <https://doi.org/10.1016/j.bodyim.2019.03.008>.
- 610 25. Turner CSV, Myers SL Jr. *Faculty of Color in Academe: Bittersweet Success*. Boston:  
611 Allyn and Bacon; 2000.
- 612 26. Crenshaw K. Mapping the margins: Intersectionality, Identity Politics, and Violence  
613 against Women of Color. *Stanford Law Review*. 1991;43:1241-1299.
- 614 27. Davis S, Brown K. Automatically discounted: Using Black feminist theory to critically  
615 analyze the experiences of Black female faculty. *International Journal of Educational*  
616 *Leadership Preparation*. 2017;12(1):n1.
- 617 28. Obi OC, Nnonyelu AC, Onobrakpeya A, Ogundele OJ. Benefits and barriers to physical  
618 activity among African women: A systematic review. *Sports Medicine and Health*  
619 *Science*. 2023 Mar;5(1):59-66.
- 620 29. Small ML. What is "qualitative" in qualitative research? Why the answer does not matter  
621 but the question is important. *Qualitative Sociology*. 2021;1-8
- 622 30. Barnett TM, Praetorius RT. Knowledge is (not) power: Healthy eating and physical  
623 activity for African-American women. *Social work in health care*. 2015 Apr 21;54(4):365-  
624 82.
- 625 31. Critical Appraisal Skills Programme. CASP Qualitative Studies Checklist. [Internet].  
626 2023. Available from: [https://casp-uk.net/checklists/casp-qualitative-studies-checklist-](https://casp-uk.net/checklists/casp-qualitative-studies-checklist-fillable.pdf)  
627 [fillable.pdf](https://casp-uk.net/checklists/casp-qualitative-studies-checklist-fillable.pdf). Accessed: Oct. 18, 2023.
- 628 32. Price AE, Greer B, Tucker A. Older Black Women's Experiences Initiating and  
629 Maintaining Physical Activity: Implications for Theory and Practice. *Journal of Aging and*  
630 *Physical Activity*. 2013 Jul;21(3):348-66.
- 631 33. Joseph RP, Ainsworth BE, Mathis L, Hooker SP, Keller C. Utility of Social Cognitive  
632 Theory in Intervention Design for Promoting Physical Activity among African-American  
633 Women: A Qualitative Study. *Am J Health Behav*. 2017 Sep 1;41(5):518-33.
- 634 34. Miller ST, Marolen K. Physical Activity-Related Experiences, Counseling Expectations,  
635 Personal Responsibility, and Altruism among Urban African American Women with Type  
636 2 Diabetes. *The Diabetes Educator*. 2012;38(2):229-235.  
637 <https://doi.org/10.1177/0145721712437558>.
- 638 35. Mama SK, McCurdy SA, Evans AE, Thompson DI, Diamond PM, Lee RE. Using  
639 community insight to understand physical activity adoption in overweight and obese

- 640 African American and Hispanic women: a qualitative study. *Health Education &*  
641 *Behavior*. 2015;42(3):321-328.
- 642 36. Doldren MA, Webb FJ. Facilitators of and barriers to healthy eating and physical activity  
643 for Black women: A focus group study in Florida, USA. *Critical Public Health*.  
644 2012;23(1):32–38. <https://doi.org/10.1080/09581596.2012.753407>.
- 645 37. Hubbell AM, Hardy EC, Astroth KS, Jenkins SH, Woith WM, Mallory C. A qualitative  
646 study of influences on long-term physical activity in physically active African American  
647 women. *Nurs Forum*. 2020 Apr;55(2):227–35.
- 648 38. Krans EE, Chang JC. A Will Without a Way: Barriers and Facilitators to Exercise During  
649 Pregnancy of Low-Income, African American Women. *Women & Health*.  
650 2011;51(8):777–794. <https://doi.org/10.1080/03630242.2011.633598>.
- 651 39. Sebastião E, Chodzko-Zajko W, Schwingel A. An In-Depth Examination of Perceptions  
652 of Physical Activity in Regularly Active and Insufficiently Active Older African American  
653 Women: A Participatory Approach. *PLOS ONE*. 2015;10(11):e0142703.  
654 <https://doi.org/10.1371/journal.pone.0142703>.
- 655 40. Sebastião E, Ibe-Lamberts K, Bobitt J, Schwingel A, Chodzko-Zajko W. Employing a  
656 Participatory Research Approach to Explore Physical Activity among Older African  
657 American Women. *Journal of Aging Research*. 2014;2014:1–8.
- 658 41. Dlugonski D, Martin TR, Mailey EL, Pineda E. Motives and Barriers for Physical Activity  
659 among Low-Income Black Single Mothers. *Sex Roles*. 2017;77(5–6):379–392.  
660 <https://doi.org/10.1007/s1199-016-0718-7>.
- 661 42. Huebschmann AG, Campbell LJ, Brown CS, Dunn AL. “My hair or my health:”  
662 Overcoming barriers to physical activity in African American women with a focus on  
663 hairstyle-related factors. *Women & Health*. 2016;56(4):428–447.
- 664 43. Joseph RP, Coe K, Ainsworth BE, Hooker SP, Mathis L, Keller C. Hair As a Barrier to  
665 Physical Activity among African American Women: A Qualitative Exploration. *Front*  
666 *Public Health*. 2018 Jan 17;5:367.
- 667 44. Baruth M, Sharpe PA, Parra-Medina D, Wilcox S. Perceived Barriers to Exercise and  
668 Healthy Eating Among Women from Disadvantaged Neighborhoods: Results from a  
669 Focus Groups Assessment. *Women & Health*. 2014;54(4):336–353.  
670 <https://doi.org/10.1080/03630242.2014.896443>.
- 671 45. Justin TA, Jette S. “That chart ain’t for us”: How Black women understand “obesity,”  
672 health, and physical activity. *Health*. 2022;26(5):605–621.  
673 <https://doi.org/10.1177/13634593211046844>.
- 674 46. Sebastião E, Chodzko-Zajko W, Schwingel A. The need to modify physical activity  
675 messages to better speak to older African American women: A pilot study. *BMC Public*  
676 *Health*. 2015;15(1):1–10. <https://doi.org/10.1186/s12889-015-2317-x>.
- 677 47. Evans LK. Rural Black women’s thoughts about exercise. *Applied Nursing Research*.  
678 2011 Nov;24(4):200–6.
- 679 48. Redmond ML, Deibert LF, Knapp K, Collins TC. Moderate physical activity and healthy  
680 eating habits among older African American women with diabetes and hypertension: a  
681 qualitative study of barriers and facilitators. *Ethnicity & Health*. 2023 Jul 4;28(5):781–93.
- 682 49. Harley AE, Rice J, Walker R, Strath SJ, Quintiliani LM, Bennett GG. Physically Active,  
683 Low-Income African American Women: An Exploration of Activity Maintenance in the  
684 Context of Sociodemographic Factors Associated with Inactivity. *Women & Health*.  
685 2014;54(4):354–372. <https://doi.org/10.1080/03630242.2014.896440>.
- 686 50. Sweeney AM, Wilson DK, Brown A. A qualitative study to examine how differences in  
687 motivation can inform the development of targeted physical activity interventions for  
688 African American women. *Evaluation and Program Planning*. 2019;77:101718.  
689 <https://doi.org/10.1016/j.evalprogplan.2019.101718>.



- 690 51. Perez AD, Dufault SM, Spears EC, Chae DH, Woods-Giscombe CL, Allen AM.  
691 Superwoman Schema and John Henryism among African American women: An  
692 intersectional perspective on coping with racism. *Social Science & Medicine*.  
693 2023;316:115070.
- 694 52. Prochaska JO, DiClemente CC. Stages and processes of self-change of smoking:  
695 toward an integrative model of change. *Journal of consulting and clinical psychology*.  
696 1983;51(3):390.
- 697 53. Salzman J. Feminist Theory and Criticism. In: *Encyclopedia of African-American Culture*  
698 *and History*. 2nd ed. New York: Macmillan Library Reference; 2006. p. 758-762.
- 699 54. Small ML. What is “qualitative” in qualitative research? Why the answer does not matter  
700 but the question is important. *Qualitative Sociology*. 2021;1-8.
- 701 55. Jansen M, Ettema D, Pierik F, Dijst M. Sports Facilities, Shopping Centers or Homes:  
702 What Locations are Important for Adults’ Physical Activity? A Cross-Sectional Study.  
703 *IJERPH*. 2016 Mar 4;13(3):287.
- 704 56. Tamir C. The Growing Diversity of Black America. Pew Research. [Internet]. 2021 Mar  
705 25 [cited 2023 Sep 14]. Available from: <https://www.pewresearch.org/social-trends/2021/03/25/the-growing-diversity-of-black-america/>.

709

710

711

712

713

714

715

716

717

718

719

720

721

722

723

724

725

726

727

728

729

730

731

732

733

734

735

736

737

738

Figure 1: Visual representation of the sampling process

1  
2  
3  
4  
5  
6  
7  
8  
9  
10  
11  
12  
13  
14  
15  
16  
17  
18  
19  
20  
21  
22  
23  
24  
25  
26  
27  
28  
29  
30  
31  
32  
33  
34  
35  
36  
37  
38  
39  
40  
41  
42  
43  
44  
45  
46  
47  
48  
49  
50  
51

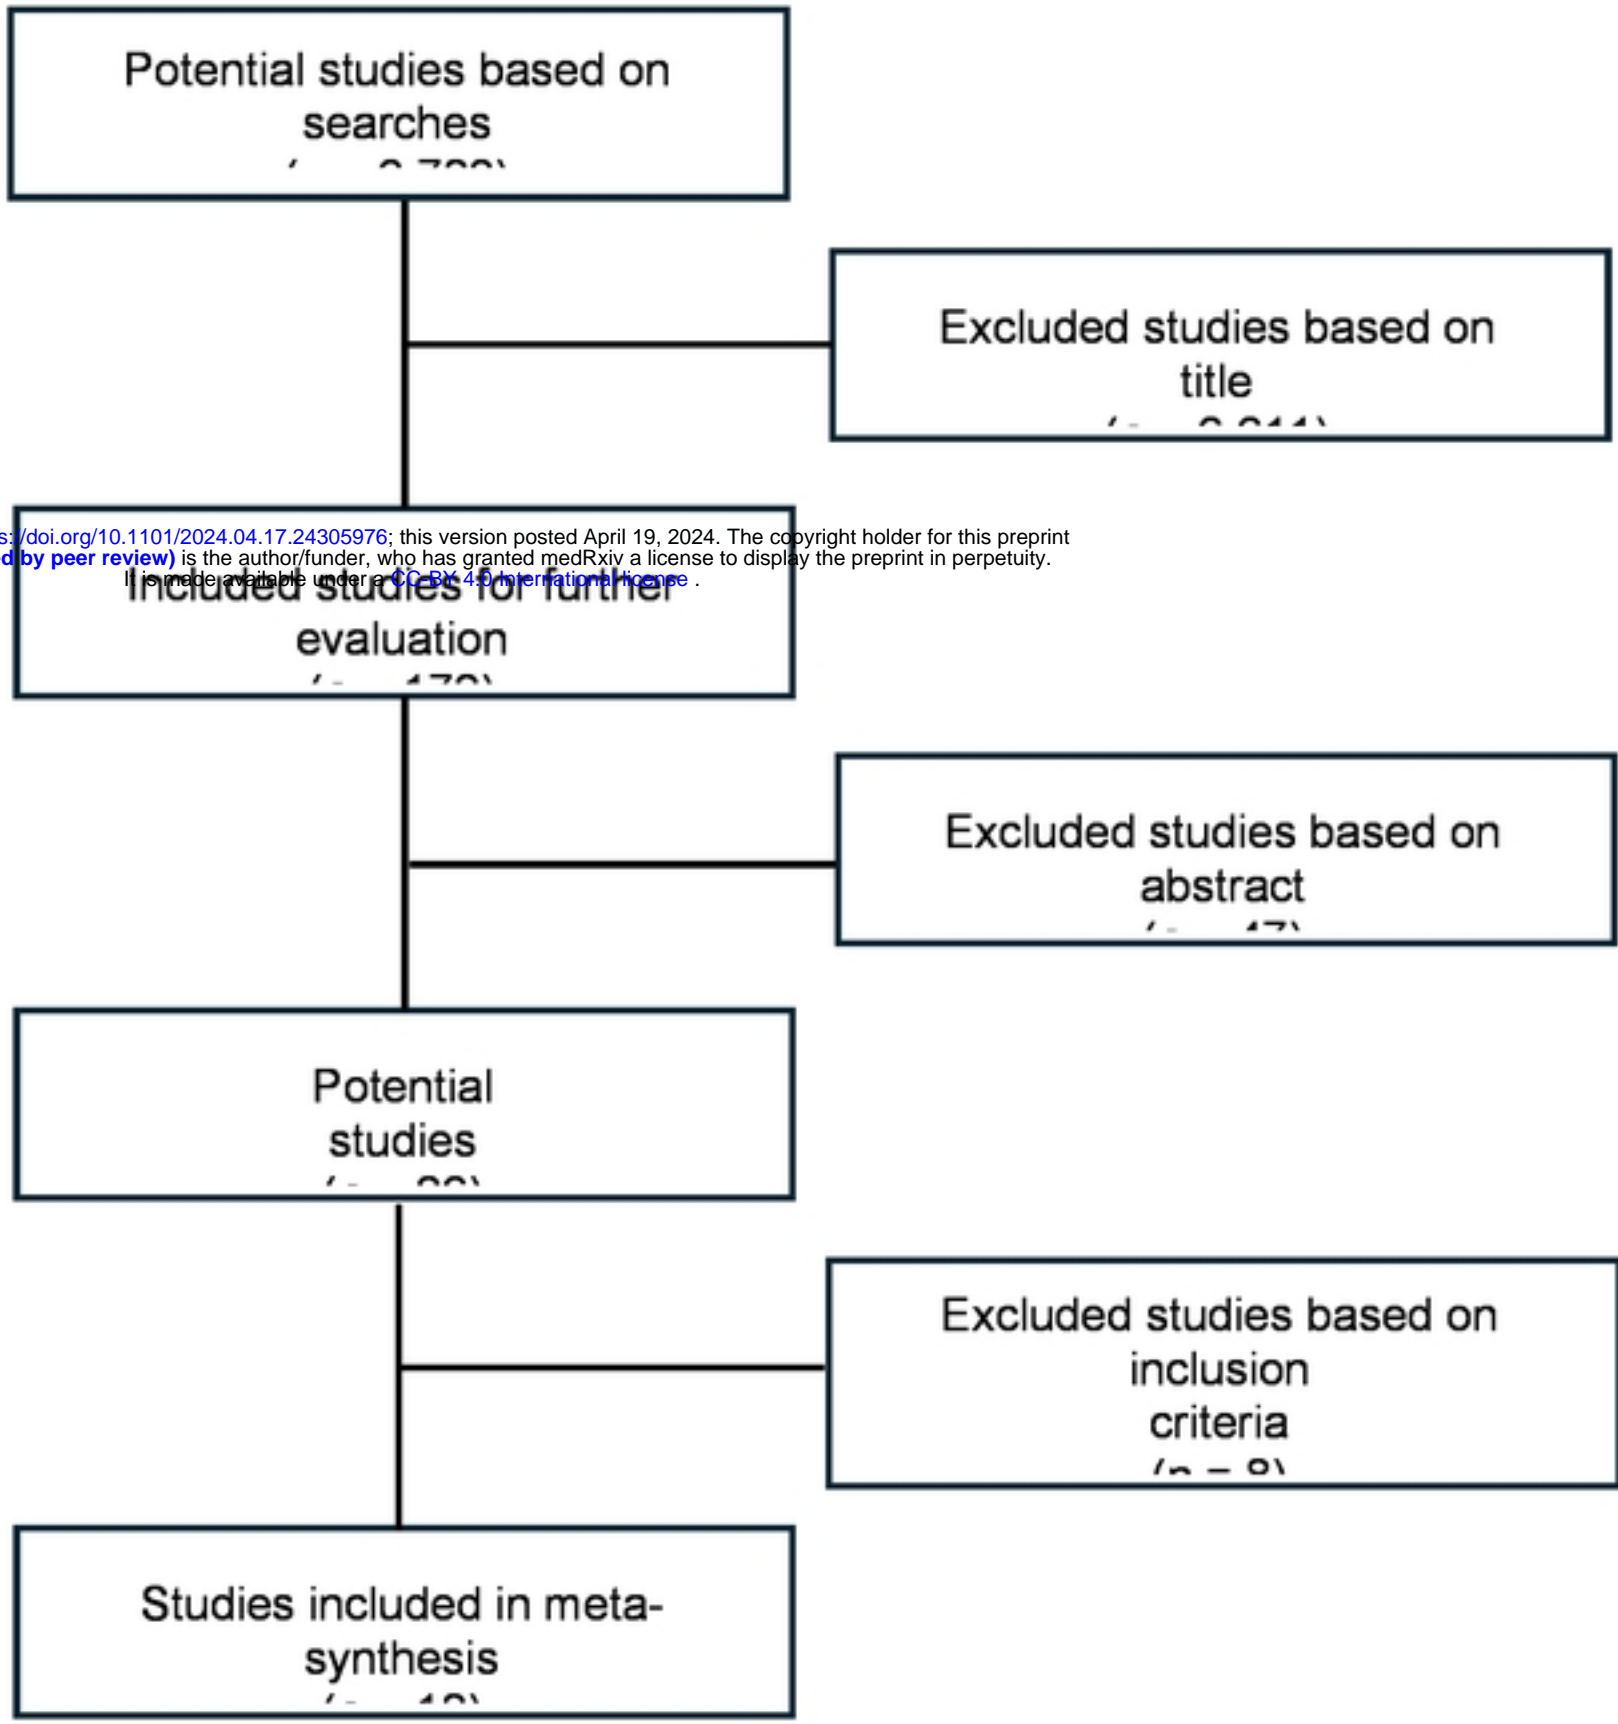

medRxiv preprint doi: <https://doi.org/10.1101/2024.04.17.24305976>; this version posted April 19, 2024. The copyright holder for this preprint (which was not certified by peer review) is the author/funder, who has granted medRxiv a license to display the preprint in perpetuity. It is made available under a CC-BY 4.0 International license.

52 **Table 1:** Demographic data drawn from the Eighteen Studies included in this review

53

| <b>Authors (year)</b>   | <b>Data Collection Strategy</b> | <b>n</b> | <b>Age</b> | <b>Location</b>                 | <b>Quality Check Total Score</b> |
|-------------------------|---------------------------------|----------|------------|---------------------------------|----------------------------------|
| Baruth et al. 2014      | Focus groups                    | 28       | 25-50      | Columbia, SC                    | 7.5                              |
| Dlugonski et al. 2016   | Semi-structured focus groups    | 32       | 18-53      | United States                   | 7.5                              |
| Doldren & Webb 2013     | focus groups                    | 40       | 18-45      | Broward County, Florida         | 7                                |
| Evans 2011              | Interviews                      | 20       | 40-60      | Southern rural county (AR)      | 9.5                              |
| Harley et al. 2014      | Interviews                      | 14       | 26-65      | Boston, MA                      | 9                                |
| Hubbell et al. 2020     | Interviews                      | 14       | 35-65      | Midwestern US                   | 8.5                              |
| Huebschmann et al. 2015 | Focus groups                    | 32       | 19-73      | Metropolitan Detroit area       | 9.5                              |
| Joseph et al. 2017      | Focus groups                    | 25       | 24-49      | Greater Phoenix area            | 8.5                              |
| Joseph et al. 2018      | Focus groups                    | 25       | 24-49      | Greater Phoenix area            | 9                                |
| Justin & Jette 2021     | Interviews                      | 8        | 18+        | Maryland                        | 9                                |
| Krans & Chang 2011      | Focus groups                    | 34       | 18-30      | United States                   | 9                                |
| Mama et al. 2015        | Interviews                      | 11       | -          | Austin & Houston, TX            | 9                                |
| Miller & Marolen 2012   | Focus groups                    | 11       | 21-50      | Nashville, TN                   | 9                                |
| Price et al. 2013       | Interviews                      | 15       | 60+        | Eastern coast of US             | 7.5                              |
| Redmond et al. 2022     | Semi-structured interviews      | 26       | 55+        | Kansas and Missouri             | 8                                |
| Sebastião et al. 2014   | Interviews                      | 7        | 65-75      | Urbana-Champaign, IL            | 9                                |
| Sebastião et al. 2015   | Focus groups                    | 20       | 60-80      | Central Illinois                | 9                                |
| Sweeney et al. 2019     | Focus groups                    | 31       | 24-69      | Suburban Southeastern Community | 9                                |

54

55

56

57

58

59

60

61

62

63 **Table 2:** Themes Extracted Directly from the Original Studies  
64  
65

| Themes as Coded by the Author                                                                                                                                                                                                                                                                                                                                                                                                                                                                                                                                                                                                                                                                                                                                                                                                                                                                                                                                 | Authors/Year of Study |
|---------------------------------------------------------------------------------------------------------------------------------------------------------------------------------------------------------------------------------------------------------------------------------------------------------------------------------------------------------------------------------------------------------------------------------------------------------------------------------------------------------------------------------------------------------------------------------------------------------------------------------------------------------------------------------------------------------------------------------------------------------------------------------------------------------------------------------------------------------------------------------------------------------------------------------------------------------------|-----------------------|
| Personal Barriers<br>Social Barriers<br>Environmental Barriers<br>Race and Culture                                                                                                                                                                                                                                                                                                                                                                                                                                                                                                                                                                                                                                                                                                                                                                                                                                                                            | Baruth et al. 2014    |
| Health Behavior Motives<br>Health Behavior Barriers                                                                                                                                                                                                                                                                                                                                                                                                                                                                                                                                                                                                                                                                                                                                                                                                                                                                                                           | Dlugonski et al. 2016 |
| Knowledge and Motivation<br>The family: learning from, and being, a role model<br>Facilitators and barriers: preplanning and 'laziness'                                                                                                                                                                                                                                                                                                                                                                                                                                                                                                                                                                                                                                                                                                                                                                                                                       | Doldren & Webb 2013   |
| <small>medRxiv preprint doi: <a href="https://doi.org/10.1101/2024.04.17.24305976">https://doi.org/10.1101/2024.04.17.24305976</a>; this version posted April 19, 2024. The copyright holder for this preprint (which was not certified by peer review) is the author/funder, who has granted medRxiv a license to display the preprint in perpetuity. It is made available under a <a href="https://creativecommons.org/licenses/by/4.0/">CC-BY 4.0 International license</a>.</small><br>Global Factors<br>Thoughts about exercise and the heart<br>Exercise and the heart<br>Internal barriers<br>Physical barriers<br>Mental/Emotional barriers<br>External barriers<br>Other obligations<br>No partner<br>Environmental barriers<br>Reasons to exercise<br>Encouragement<br>Improves other conditions<br>Relieves stress/Makes me feel better<br>Taking action<br>Current practices<br>Need to exercise more<br>Preferred exercise<br>How much exercise? | Evans 2011            |
| Challenges to maintaining physical activity<br>Financial constraints<br>Physical strain<br>History of sedentary relapse                                                                                                                                                                                                                                                                                                                                                                                                                                                                                                                                                                                                                                                                                                                                                                                                                                       | Harley et al. 2014    |
| Individual Level<br>Being healthy<br>Having increased health awareness<br>Managing their lifestyle to remain physically active<br>Social Level<br>Role modeling<br>Observing quality of life with friends<br>Family and coworkers<br>Establishing mutual support of PA<br>Environmental Level<br>Using the neighborhood as a venue to perform PA with friends and family<br>Using the work environment as a venue to encourage PA                                                                                                                                                                                                                                                                                                                                                                                                                                                                                                                             | Hubbell et al. 2020   |

|                                                                                                                                                                                                                                                                                                                                                                                                                                                                                                                                                                                                                                                                                                                                                                                                                                                                                                                                                                                                                                                                                                                                                                                                                                                                                                                                                                                                                                                                                                                                                                                                                                                                                                                                                                                                                                                                                                                                                                                                                                                                                                                                                                                                  |                                |
|--------------------------------------------------------------------------------------------------------------------------------------------------------------------------------------------------------------------------------------------------------------------------------------------------------------------------------------------------------------------------------------------------------------------------------------------------------------------------------------------------------------------------------------------------------------------------------------------------------------------------------------------------------------------------------------------------------------------------------------------------------------------------------------------------------------------------------------------------------------------------------------------------------------------------------------------------------------------------------------------------------------------------------------------------------------------------------------------------------------------------------------------------------------------------------------------------------------------------------------------------------------------------------------------------------------------------------------------------------------------------------------------------------------------------------------------------------------------------------------------------------------------------------------------------------------------------------------------------------------------------------------------------------------------------------------------------------------------------------------------------------------------------------------------------------------------------------------------------------------------------------------------------------------------------------------------------------------------------------------------------------------------------------------------------------------------------------------------------------------------------------------------------------------------------------------------------|--------------------------------|
| <p>Barriers:</p> <ul style="list-style-type: none"> <li>Perspiration: The burden of “sweating my hair out”</li> <li>Time burden of “sweating my hair out”</li> <li>Financial burden of “sweating my hair out”</li> <li>Sociocultural norm for hairstyle appearance</li> <li>Environment—Drying effects on hairstyle</li> </ul>                                                                                                                                                                                                                                                                                                                                                                                                                                                                                                                                                                                                                                                                                                                                                                                                                                                                                                                                                                                                                                                                                                                                                                                                                                                                                                                                                                                                                                                                                                                                                                                                                                                                                                                                                                                                                                                                   | <p>Huebschmann et al. 2015</p> |
| <p>Behavioral Capability</p> <ul style="list-style-type: none"> <li>Lack of knowledge on the US PA Guidelines for health</li> <li>Ambiguity in the terms “exercise” and PA</li> <li>Desire for a specific exercise prescription and plan</li> <li>When initiating a PA program, a strong social support network is needed</li> </ul> <p>Outcome Expectations</p> <ul style="list-style-type: none"> <li>Improved health outcomes, including: Reduced risk for high blood pressure and type 2 diabetes Reduced stress Improved sleep</li> <li>Weight loss</li> <li>Increased energy and ability to engage in more activities with their family</li> <li>Being a good role model to others</li> </ul> <p>Self-efficacy</p> <ul style="list-style-type: none"> <li>PA was encouraged and enjoyed as children through games and sports</li> <li>Negative experiences with PA during childhood were associated with forced sporting activities or concerns about body development</li> <li>Negative experience with PA as adults were related to engaging in PA that was too intense or beyond their skill level</li> </ul> <p>Social Support</p> <ul style="list-style-type: none"> <li>Family members emerged as a key source of social support</li> <li>Discouragement from family/friends for PA was negligible</li> <li>Messages of social support should be positive and encouraging; criticism should be avoided as it is not viewed as motivational</li> <li>Women desired to hear personal testimonials from other AA women on how they have successfully increased PA</li> </ul> <p>Self-regulation</p> <ul style="list-style-type: none"> <li>Women identified a variety of strategies to incorporate more PA into their daily schedules</li> <li>Scheduling PA into daily schedules was preferred</li> <li>Women reported previous attempts with self-monitoring, but ultimately stopped due to burden or loss of interest</li> <li>Women emphasized the importance of setting realistic short-term goals to achieve long-term goals</li> <li>Potential reinforcements/rewards for meeting PA goals included monetary incentives, clothing, and words of encouragement/praise.</li> </ul> | <p>Joseph et al. 2017</p>      |

|                                                                                                                                                                                                                                                                                                                    |                       |
|--------------------------------------------------------------------------------------------------------------------------------------------------------------------------------------------------------------------------------------------------------------------------------------------------------------------|-----------------------|
| Impact of perspiration on hair and hairstyle maintenance<br>Image and social comparison<br>Solutions to overcome hair-related barriers to PA                                                                                                                                                                       | Joseph et al. 2018    |
| Questioning the "dominant obesity discourse": "That chart ain't for us, that's for them"<br>Reifying biological determinism: "There is something coded in our DNA"<br>"Thick" body politics and black femininity: "It's something that's engrained"                                                                | Justin & Jette 2021   |
| Individual/Intrapersonal Barriers<br>Physical Limitations<br>Lack of Time<br>Information Barriers<br><b>Lack of Healthcare Provider Guidance</b><br>Resource Barriers<br>Financial Constraints<br>Lack of Neighborhood Facilities and Resources<br>Socio-cultural Barriers<br>African American Cultural Influences | Krans & Chang 2011    |
| Intrapersonal Factors<br>Interpersonal Relationships<br>Accessibility and Safety<br>Caretaking for Others                                                                                                                                                                                                          | Mama et al. 2015      |
| General physical activity/exercise perceptions<br>Barriers to physical activity<br>Enablers to physical activity<br>Comparison of physical activity counseling expectations and experiences<br>Physical activity-related health responsibility<br>Greater concern for health care-related needs of others          | Miller & Marolen 2012 |
| PA Initiation<br>Integration of PA in Daily Life<br>Temporary Lapses<br>Strategies for Maintaining PA<br>Regular Routine<br>Flexible Planning and Routine Adaptation                                                                                                                                               | Price et al. 2013     |
| Barriers<br>Interpersonal issues<br>Subtheme for physical activity barriers: Pain, time, motivation to be active<br>Limited definition of physical activity<br>Facilitators<br>Routine of regular physical activity<br>Influence of family                                                                         | Redmond et al. 2022   |
| Social Facilitators<br>Environmental Facilitators<br>Personal Barriers<br>Environmental Barriers                                                                                                                                                                                                                   | Sebastião et al. 2014 |

|                                                                                                                                                                                                                                |                       |
|--------------------------------------------------------------------------------------------------------------------------------------------------------------------------------------------------------------------------------|-----------------------|
| Knowledge and perceptions of physical activity<br>Factors influencing physical activity participation<br>Physical health and psychological and emotional health<br>Financial problems<br>Family demands<br>Unsafe neighborhood | Sebastião et al. 2015 |
| Past PA Engagement<br>Sources of Motivation for PA<br>PA Barriers<br>Resources needed for PA<br>Role of family and friends                                                                                                     | Sweeney et al. 2019   |

66

medRxiv preprint doi: <https://doi.org/10.1101/2024.04.17.24305976>; this version posted April 19, 2024. The copyright holder for this preprint (which was not certified by peer review) is the author/funder, who has granted medRxiv a license to display the preprint in perpetuity. It is made available under a [CC-BY 4.0 International license](https://creativecommons.org/licenses/by/4.0/).

67

68

69

70

71

72

73

74

75

76 **Table 3: Translation of Themes**

| <b>New Overarching Theme</b>             | <b>Sub-Theme</b>                     | <b>Authors</b>                                                                                                                                                                                                             |
|------------------------------------------|--------------------------------------|----------------------------------------------------------------------------------------------------------------------------------------------------------------------------------------------------------------------------|
| General Experiences of all People        | Motivation<br>Habit                  | Evans 2011<br>Joseph et al. 2017<br>Price et al. 2013<br>Redmond et al. 2022<br>Sebastião et al. 2014                                                                                                                      |
|                                          | Intent to Engage                     | Doldren & Webb 2013<br>Evans 2011<br>Harley et al. 2014<br>Joseph et al. 2017<br>Mama et al. 2015<br>Miller & Merolen 2012<br>Redmond et al. 2022<br>Sebastião et al. 2014<br>Sebastião et al. 2015<br>Sweeney et al. 2019 |
|                                          | Structured Support<br>Social Norms   | Hubbell et al. 2020<br>Joseph et al. 2017<br>Redmond et al. 2022<br>Sebastião et al. 2014                                                                                                                                  |
|                                          | Social Support                       | Evans 2011<br>Joseph et al. 2017<br>Krans & Chang 2011<br>Mama et al. 2015<br>Miller & Merolen 2012                                                                                                                        |
|                                          | Overall Health<br>Health Outcomes    | Hubbell et al. 2020<br>Joseph et al. 2017<br>Sebastião et al. 2014                                                                                                                                                         |
|                                          | Health Literacy                      | Evans 2011<br>Joseph et al. 2017<br>Redmond et al. 2022                                                                                                                                                                    |
|                                          | Environmental Factors<br>Environment | Hubbell et al. 2020<br>Sebastião et al. 2014                                                                                                                                                                               |
| Race-related Experiences of Black People | Low Access                           | Evans 2011<br>Dlugonski et al. 2016<br>Krans & Chang 2011<br>Mama et al. 2015<br>Redmond et al. 2022                                                                                                                       |

medRxiv preprint doi: <https://doi.org/10.1101/2024.04.17.24305976>; this version posted April 19, 2024. The copyright holder for this preprint (which was not certified by peer review) is the author/funder, who has granted medRxiv a license to display the preprint in perpetuity. It is made available under a [CC-BY 4.0 International license](#).



|                                           |                              |                                                                                                |
|-------------------------------------------|------------------------------|------------------------------------------------------------------------------------------------|
| Intersectional Experiences of Black Women | Black Hair<br><br>Body Ideal | Huebschmann et al. 2015<br>Joseph et al. 2018<br><br>Baruth et al. 2014<br>Justin & Jette 2021 |
|-------------------------------------------|------------------------------|------------------------------------------------------------------------------------------------|

77

78

79

80

81

medRxiv preprint doi: <https://doi.org/10.1101/2024.04.17.24305976>; this version posted April 19, 2024. The copyright holder for this preprint (which was not certified by peer review) is the author/funder, who has granted medRxiv a license to display the preprint in perpetuity. It is made available under a [CC-BY 4.0 International license](https://creativecommons.org/licenses/by/4.0/).

82

83

84

85

86

87

88

89

90

91

92

93

94

95

96

97

98

99
